# Supplementary material for: Human lung-resident mucosal-associated invariant T cells are abundant, express antimicrobial proteins, and are cytokine responsive
Source: PubMed Central journal article supplement (PMC9463188; doi:10.1038/s42003-022-03823-w), 2022-09-09
Supplement: 42003_2022_3823_MOESM1_ESM.pdf [file 42003_2022_3823_MOESM1_ESM.pdf]

# **Human Lung-resident Mucosal-Associated Invariant T cells are Abundant, Express Antimicrobial Proteins, and are Cytokine Responsive**

Erin W. Meermeier<sup>1</sup>, Christina L. Zheng<sup>2</sup>, Jessica G Tran<sup>3</sup>, Shogo Soma<sup>1</sup>, Aneta H. Worley<sup>3</sup>, David I. Weiss<sup>4</sup>, Robert L. Modlin<sup>5</sup>, Gwendolyn Swarbrick<sup>1,3</sup>, Elham Karamooz<sup>1,3</sup>, Sharon Khuzwayo<sup>6,7</sup>, Emily B. Wong<sup>6,7,8,9</sup>, Marielle C. Gold<sup>1,3</sup>, David M. Lewinsohn<sup>1,3</sup>

<sup>1</sup> Department of Pulmonary and Critical Care Medicine, Oregon Health & Science University, Portland, OR 97239, USA

<sup>2</sup> Department of Medical Informatics and Clinical Epidemiology, Oregon Health & Science University, Portland, OR 97239, USA

<sup>3</sup> VA Portland Health Care System, Portland, OR 97239, USA

<sup>4</sup> David Geffen School of Medicine at UCLA, Los Angeles, CA 90095, USA

<sup>5</sup> Division of Dermatology, Department of Medicine, David Geffen School of Medicine at University of California, Los Angeles, Los Angeles, CA 90095, USA

<sup>6</sup> Africa Health Research Institute, Durban, South Africa

<sup>7</sup> School of Laboratory Medicine and Medical Sciences, University of KwaZulu-Natal, Durban, South Africa

<sup>8</sup> Division of Infectious Diseases, Massachusetts General Hospital, Boston, MA, USA

<sup>9</sup> Harvard Medical School, Boston, MA, USA

<sup>10</sup> Division of Infection and Immunity, University College London, London, UK

**Supplemental files:**

**Supplemental Table 1**

**Supplemental Figure 1-5**

| Donor number | Cause of Death         | Gender | Age | BMI (kg/m <sup>2</sup> ) |
|--------------|------------------------|--------|-----|--------------------------|
| OD98         | Cardiovascular anoxia  | F      | 60  | 40.8                     |
| OD101        | Cerebrovascular/Stroke | F      | 64  | 27.5                     |
| OD103        | Head Trauma            | M      | 12  | 14.4                     |
| OD104        | Anoxia                 | F      | 15  | 29.7                     |
| OD105        | Cerebrovascular/Stroke | M      | 11  | 13.7                     |
| OD107        | Cerebrovascular/Stroke | M      | 67  | 25.3                     |
| OD111        | Anoxia                 | F      | 22  | 22.5                     |
| OD112        | Cerebrovascular/Stroke | F      | 60  | 33.5                     |
| OD113        | Cerebrovascular/Stroke | M      | 69  | 22.4                     |
| OD114        | Cerebrovascular/Stroke | M      | 56  | 17.6                     |
| OD116        | Anoxia                 | M      | 10  | 17.3                     |
| OD117        | Cerebrovascular/Stroke | F      | 67  | 32.1                     |
| OD119        | Cerebrovascular/Stroke | F      | 58  | 26.4                     |
| OD120        | Anoxia                 | F      | 39  | 16.9                     |
| OD121        | Anoxia                 | F      | 6   | 20.7                     |
| OD123        | Cerebrovascular/Stroke | M      | 39  | 29.3                     |
| OD126        | Cerebrovascular/Stroke | M      | 22  | 18.6                     |
| OD128        | Cerebrovascular/Stroke | F      | 62  | 28.2                     |
| OD133        | Anoxia                 | M      | 31  | 31                       |
| OD144        | Cardiovascular anoxia  | M      | 51  | 32.5                     |

**Supplemental Table 1. Pacific Northwest Transplant Bank donors provide lung tissue for single T cell analyses.** Donor lung tissue was accepted for our study based on criteria detailed in the methods section. OD103, 104, 105, and 107 were used for RNA-seq analysis. The remaining lung donors were used for validation experiments.

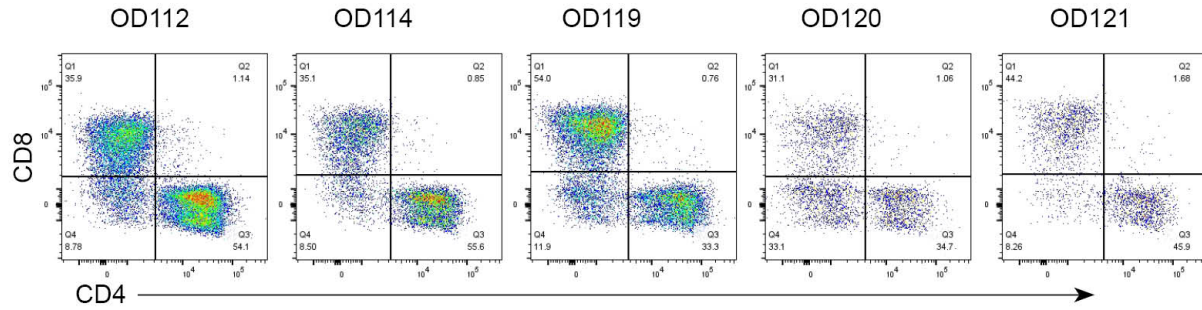

**Supplemental Figure 1. Lung MAIT cells express CD8 and CD4.** Flow cytometry on lung samples to measure CD4 and CD8 co-receptor expression. Lung cells were rested overnight and expression on all CD3<sup>+</sup> T cells are shown.

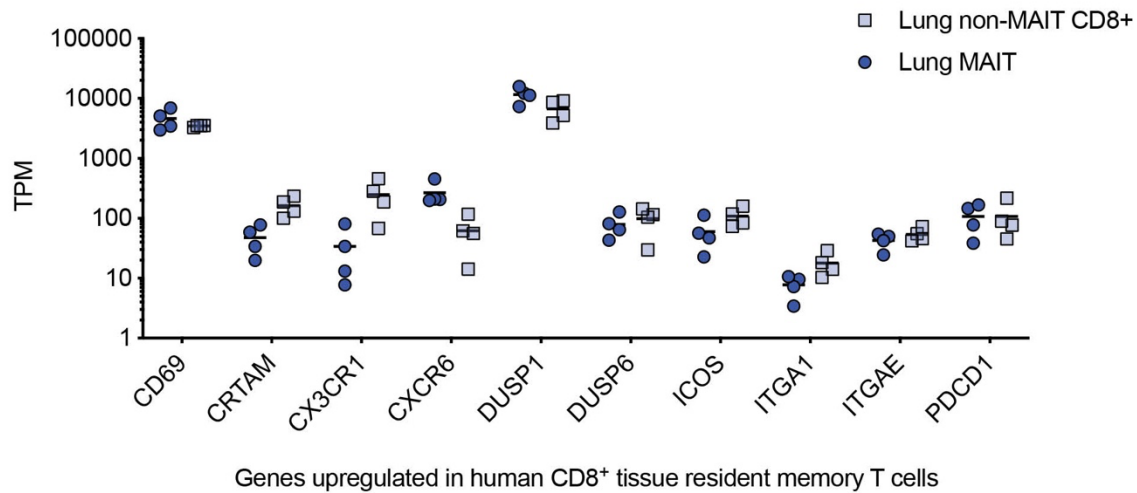

**Supplemental Figure 2. Lung MAIT cells express genes associated with human tissue-resident memory CD8<sup>+</sup> T cells.** Transcripts per million (TPM) reads from MR1/5-OP-RU<sup>+</sup> CD8<sup>+</sup> T cells derived from lung samples (Lung MAIT, blue filled circles), and MR1/5-OP-RU negative CD8<sup>+</sup> T cells derived from lung samples (Lung non-MAIT CD8<sup>+</sup>, blue open squares). The mean of each group of samples is shown as a black bar. Genes listed on the x-axis are grouped by whether they have been observed as upregulated (A) in human CD8<sup>+</sup> tissue-resident memory T cells compared to non-tissue resident memory T cells.

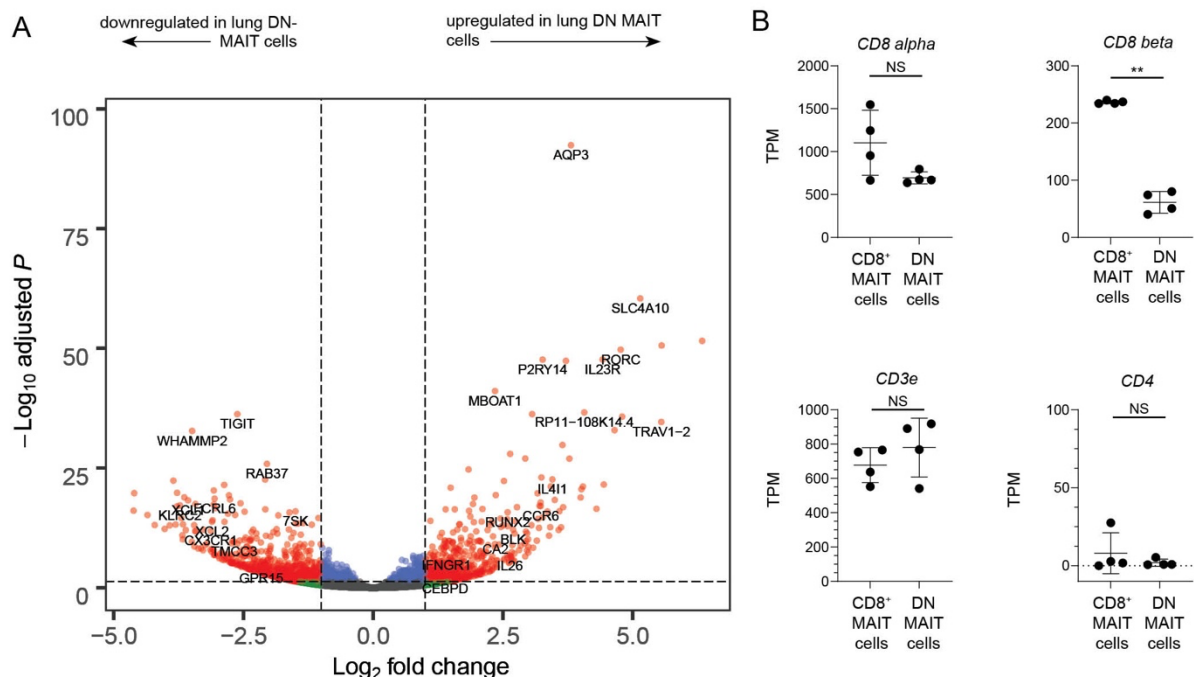

**Supplemental Figure 3. Differentially expressed genes of CD8<sup>+</sup>CD4<sup>-</sup> MAIT cells in the lung.**

A. A volcano plot displays the differentially expressed genes between lung derived CD8<sup>+</sup>CD4<sup>-</sup> MAIT cells (on the right) and lung-derived CD8<sup>+</sup>CD4<sup>-</sup> lymphocytes (left) . Significantly differentially expressed genes (log<sub>2</sub> fold change >1 or <-1, and FDR p-value ≤ 0.05) are represented as red. B. Box plots of transcript per million (TPM) reads of genes commonly associated with MAIT cells, from RNA-seq samples of CD8<sup>+</sup> MAIT cells or non-MAIT CD8<sup>+</sup> T cells derived from four lung samples. Box plots indicate the median and range of the TPM RNA-seq reads. FDR \*P < 0.05, \*\*P < 0.01, \*\*\*\*P < 0.0001.

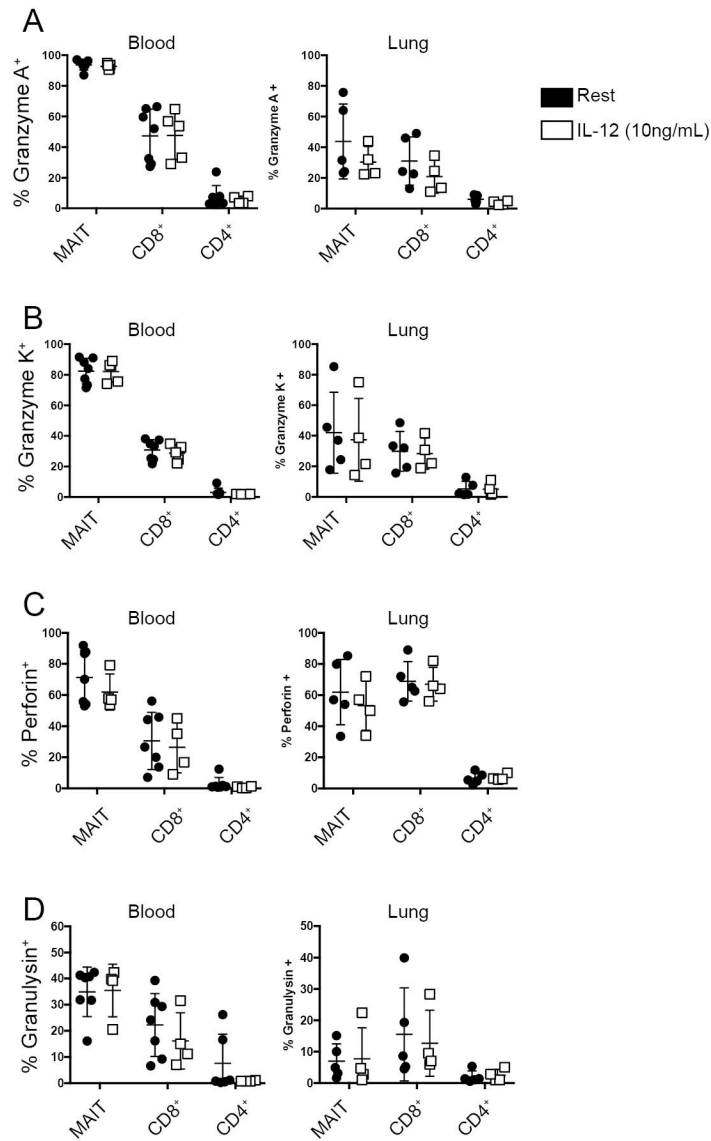

**Supplemental Figure 4. Poised expression of cytolytic proteins by subset of human T cells in the lung compared to the blood.** Cells derived from PBMC or lung samples were either rested (black squares) overnight or in the presence of IL-12 cytokine (white squares, 10 ng/mL) and then stained intracellularly for (A) granzyme A, (B) granzyme K, (C) perforin, (D) granulysin. The frequency of cells staining positively for each protein is plotted from 5 PBMC donors (left) and 5 lung donors (right). Representative results of three experiments are shown, n = 5 biological replicates.

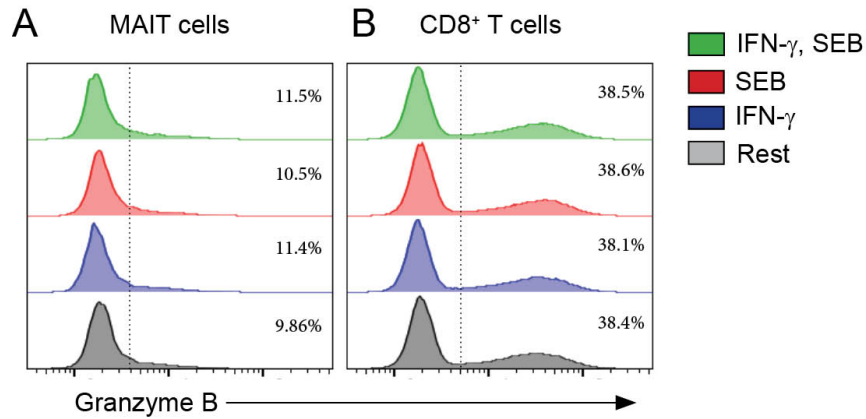

**Supplemental Figure 5. Intracellular levels of granzyme B in MAIT cells in the context of TCR stimulation or IFN- $\gamma$ .** Cells derived from PBMC were either rested (gray histograms) overnight or in the presence of IFN- $\gamma$  (blue histograms, 10 ng/mL), SEB (red histograms), or IFN- $\gamma$  and *Staphylococcus enterotoxin B* (SEB) (green histograms) and then stained intracellularly for granzyme B. The frequency of granzyme B<sup>+</sup> MR1-tetramer<sup>+</sup> MAIT cells (A) or non-MAIT CD8<sup>+</sup> T cells (B) from one of five representative donors is plotted. Representative results of two experiments are shown.
