# Supplementary material for: Human lung-resident mucosal-associated invariant T cells are abundant, express antimicrobial proteins, and are cytokine responsive
Source: PubMed Central journal article supplement (PMC9463188; doi:10.1038/s42003-022-03823-w), 2022-09-09
Supplement: 42003_2022_3823_MOESM2_ESM.pdf [file 42003_2022_3823_MOESM2_ESM.pdf]

## Description of Additional Supplementary Files

**File name:** Supplemental Data 1

**Description:** The source data behind the graphs in the paper

**File name:** Supplemental Data 2

**Description:** Differential gene expression of lung derived MAIT cells and non-MAIT CD8+ T cells.

Genes that were enriched in MAIT samples from lung (compared to lung CD8+ non-MAIT) at thresholds of FDR-adjusted P value  $\leq 0.001$ ; and log<sub>2</sub> fold change  $> 1$  or  $< -1$ .
